# Supplementary material
Source: publisher site journal article supplement (http://content.karger.com/ProdukteDB/miscArchiv/000/093/586/Appendix.pdf)
Supplement: Supplementary file 1 [file Appendix.pdf]

Bornhöft G, Wolf U, von Ammon K, Righetti M, Maxion-Bergemann S, Baumgartner S, Thurneysen A, Matthiessen PF:  
**Effectiveness, safety and cost-effectiveness of homeopathy in general practice.** Forsch Komplementärmed 2006;13(Suppl 2);  
 DOI: 10.1159/000093586

**Appendix 1 (table to section 'systematic reviews')**

**Table 1. Overview of included reviews of homeopathic interventions with research articles and results**

| Author, Year [number in references, see article] | No. of analyzed studies | Indication           | Intervention                   | Result | Conclusion | Author's justification for divergent conclusion     | HTA conclusion | Reason                                                      |
|--------------------------------------------------|-------------------------|----------------------|--------------------------------|--------|------------|-----------------------------------------------------|----------------|-------------------------------------------------------------|
| Barnes et al. 1997 [37]                          | 6                       | post-operative ileus | all                            | +      | (+)        | not further defined reservations                    | +              | reservations not shared                                     |
| Bauer et al. 2002 [38]                           | 9                       | all                  | arnica                         | ∅      | ∅          | n.c.                                                | (+)            | + and - results cannot simply be off-set against each other |
| Boissel 1996 [39]                                | 184                     | all                  | all                            | +/(+)  | (+)        | minor quality                                       | (+)            | n.c.                                                        |
| Cucherat et al. 2000 [40]                        | 17                      | all                  | all                            | +/(+)  | (+)        | minor quality                                       | +              | drop-out < 5% too strict, up to 10% significance            |
| Ernst 1999 [41]                                  | 4                       | headache/migraine    | all                            | +/(+)  | ∅          | "vote count"                                        | (+)            | + and - results cannot simply be off-set against each other |
| Ernst 1999 [42]                                  | 6                       | all                  | all vs. conventional treatment | +      | ∅          | methodological deficiencies                         | (+)            | reservations not shared, but little data                    |
| Ernst & Barnes 1998 [43]                         | 8                       | strained muscle      | all, mostly arnica             | ∅/(+)  | ∅          | methodological deficiencies                         | ∅              | n.c.                                                        |
| Ernst & Pittler 1998 [44]                        | 8                       | all                  | arnica                         | (+)/∅  | ∅          | no effect in rigorous studies                       | (+)            | very restrictive argument - not shared                      |
| Grabia & Ernst 2003 [45]                         | 25                      | all                  | all                            | +      | +          | n.c.                                                | (+)            | study only indirect on evidence of effectiveness            |
| Hill & Doyon 1990 [46]                           | 40                      | all                  | all                            | (+)    | ∅          | not enough evidence                                 | (+)            | + and - results cannot simply be off-set against each other |
| Jonas et al. 2000 [47]                           | 6                       | rheumatoid disease   | all                            | +/(+)  | (+)        | significance not sustainable after context-analysis | (+)            | n.c.                                                        |

| Author, Year [number in references, see article] | No. of analyzed studies | Indication             | Intervention              | Result | Conclusion | Author's justification for divergent conclusion              | HTA conclusion | Reason                                                |
|--------------------------------------------------|-------------------------|------------------------|---------------------------|--------|------------|--------------------------------------------------------------|----------------|-------------------------------------------------------|
| Kleijnen et al. 1991 [48]                        | 107                     | all                    | all                       | +      | (+)        | mechanism of action in homeopathy implausible                | +              | argumentation irrelevant for evidence – not shared    |
| Linde et al. 1997 [49]                           | 89                      | all                    | all                       | +      | (+)/+      | no clear statement about single clinical conditions possible | +              | argumentation too restrictive                         |
| Linde & Jobst 1998 [50]                          | 3                       | chronic asthma         | all                       | +      | (+)        | studies not practice-relevant                                | (+)            | little clinical relevance                             |
| Linde & Melchart 1998 [51]                       | 32                      | all                    | individualized homeopathy | +/(+)  | (+)        | methodological "shortcomings"                                | +              | over-evaluation of internal validity – not shared     |
| Long 2001 [52]                                   | 4                       | osteoarthritis         | all                       | +/(+)  | (+)        | not enough RCTs                                              | (+)            | n.c.                                                  |
| Lüdtke 1999 [53]                                 | 37                      | all                    | arnica                    | +      | (+)        | "indications on effects to be taken seriously"               | (+)            | n.c.                                                  |
| Lutz 1993 [54]                                   | 22                      | all                    | all                       | (+)    | (+)        | n.c.                                                         | (+)            | n.c.                                                  |
| Smith 2001 [55]                                  | 1                       | labour induction       | all (caulophyllum)        | ∅      | ∅          | n.c.                                                         | ∅              | n.c.                                                  |
| Vickers 2000 [56]                                | 7                       | influenza              | oscillococcinum           | (+)    | (+)        | n.c.                                                         | (+)            | n.c.                                                  |
| Walach 1997 [57]                                 | 41                      | all                    | all                       | (+)    | (+)        | n.c.                                                         | (+)            | n.c.                                                  |
| Wiesenauer & Lüdtke 1996 [58]                    | 11                      | pollinosis (hay-fever) | galphimia glauca          | +      | +          | n.c.                                                         | (+)            | no independent evaluation since researcher = reviewer |

Abbreviations: n.c.: no comment, since no discrepancy occurred in HTA evaluation; +: significant effectiveness very probable, (+): trend in favour of homeopathy; ∅: no evidence for effectiveness of homeopathy

Bornhöft G, Wolf U, von Ammon K, Righetti M, Maxion-Bergemann S, Baumgartner S, Thurneysen A, Matthiessen PF:  
**Effectiveness, safety and cost-effectiveness of homeopathy in general practice.** Forsch Komplementärmed 2006;13(suppl 2):  
 DOI: 10.1159/000093586

**Table 2. Primary studies with homeopathic intervention in the indication 'Upper Respiratory Tract Infections/Allergic Reactions (URTI/A)' without control groups**

| Author, Year [number in references] | Study Type                          | No. of Cases | Homeopathic Intervention        | Indication                                         | Result (Responder Rate)                         | EBM Grade | Ext. Validity | Comments                                                                                                                                                                                                                                                                                                                                                                                                                                                                                                                                                                                                                                        |
|-------------------------------------|-------------------------------------|--------------|---------------------------------|----------------------------------------------------|-------------------------------------------------|-----------|---------------|-------------------------------------------------------------------------------------------------------------------------------------------------------------------------------------------------------------------------------------------------------------------------------------------------------------------------------------------------------------------------------------------------------------------------------------------------------------------------------------------------------------------------------------------------------------------------------------------------------------------------------------------------|
| Herzberger 1997 [59]                | observational study                 | 1479         | complex: Engystol N®            | URTI                                               | 50 – 90% (dependent on disease-form)            | 3         | n.j.          | Unsatisfactory documentation, (not only of homeopathy relevant criteria)                                                                                                                                                                                                                                                                                                                                                                                                                                                                                                                                                                        |
| Rabe 2001 [60]                      | observational study                 | 339          | complex: Husteel®               | cough                                              | 95%                                             | 3         | n.j.          | Heterogenic population; many accompanying therapies, therefore judgement more difficult                                                                                                                                                                                                                                                                                                                                                                                                                                                                                                                                                         |
| Frei 2001 [61]                      | observational study                 | 230          | individual                      | acute otitis media (AOM)                           | 72% in total; 39% after 6 and 33% after 12 hrs  | 3         | +/-           | The study was done at a time in which all AOM-children were treated with antibiotics. The homeopathic criteria on the external validity were considered in a comprehensive way. The influence of possible accompanying medication with analgetics after 6 hours was not discussed. From published data of development with placebo a 24 times higher success rate was calculated for the homeopathic therapy; it is not indicated, however, to what extent the study populations were comparable and according to which criteria the comparison studies were chosen. Treatment costs as secondary parameter show the potential for saving costs |
| Friese 1994 [62]                    | observational study                 | 30           | individual                      | otitis media                                       | 73%                                             | 3         | n.j.          | Homeopathic remedies, but applied very schematically. Interesting as pilot study; results only partially valid. Clinical effectiveness is probable; 17/30 lost to follow-up, of these only 3 were not considered as successful                                                                                                                                                                                                                                                                                                                                                                                                                  |
| Eizayaga 1996 [63]                  | observational study (retrospective) | 62           | individual                      | asthma, allergic asthma                            | 64,5% (pre-post treatment-difference p < 0,001) | 3         | +/-           | Classical homeopathy; general description good, unsatisfactory description of population                                                                                                                                                                                                                                                                                                                                                                                                                                                                                                                                                        |
| Bahe-mann 2002 [64]                 | single case study                   | 1            | Individual: Potass.chrom. C 200 | pharyngitis, tonsillitis, infectious mononucleosis | successful treatment                            | 4         | +             | Documentation good in general; only local symptoms described                                                                                                                                                                                                                                                                                                                                                                                                                                                                                                                                                                                    |

Abbreviation n.j.: not judgeable

**Table 3. Primary studies with homeopathic intervention for the indication 'Upper Respiratory Tract Infections/Allergic Reactions (URTI/A)' and conventional medical control**

| Author, Year [number in references] | Study Type | No. of Cases | Homeopathic Intervention/ Conventional Intervention                                                                                                         | Indication                                            | Result                                    | EBM Grade | Ext. Validity | Comment                                                                                                                                                                                                                                  |
|-------------------------------------|------------|--------------|-------------------------------------------------------------------------------------------------------------------------------------------------------------|-------------------------------------------------------|-------------------------------------------|-----------|---------------|------------------------------------------------------------------------------------------------------------------------------------------------------------------------------------------------------------------------------------------|
| Riley 2001 [65]                     | CCT        | 456          | individual vs. conventional therapy (no further details given)                                                                                              | URTI gen.                                             | significant for homeopathy                | 2b        | +             |                                                                                                                                                                                                                                          |
| Weber 2002 [66]                     | CCT        | 63           | clinical, with the possibility of individual therapy (mostly Cinnabaris D3 + Sinupret) vs. antibiotics, secretolytics, Xylometazoline (individual decision) | sinusitis                                             | equivalence/ trend for homeopathy         | 2a        | +/-           | Accompanying medication may distort the effect of the homeopathy group. No adjustment was made although the groups were different.                                                                                                       |
| Nusche 1998 [67]                    | CCT        | 51           | individual vs. Penicillin                                                                                                                                   | pharyngitis, tonsillitis with streptococcal infection | no advantage; significance for penicillin | 2a        | n.j.          | Altogether bad documentation, so that neither IV nor EV could be reasonably judged; practically no information for evaluation. Due to information about homeopathic training, it can be assumed that the study had a good model-validity |
| Gassinger 1981 [68]                 | RCT        | 53           | clinical, Eupatorium perfoliatum D2 vs. Aspirin                                                                                                             | common cold                                           | equivalence                               | 1b        | n.j.          | Study was not blinded                                                                                                                                                                                                                    |
| Maiwald 1998 [69]                   | RCT        | 170          | complex, Gripp-Heel® vs. acetylsalicylic acid (ASS)                                                                                                         | common cold                                           | equivalence/ trend for homeopathy         | 1b        | n.j.          | Risk of bias in terms of IV relatively large (possible deblinding, estimated ASS- rate of success not reached, selection criteria inconsistent) result hard to judge; p-values not given.                                                |
| Friese 1997 [70]                    | CCT        | 131          | individual vs. nose-drops, secretolytics, antipyretics (also individual)                                                                                    | otitis media                                          | equivalence/ trend for homeopathy         | 2a        | +/-           | Different group sizes restrict assessment of results (n = 103 in homeopathic group, n = 28 in convent. medicine).                                                                                                                        |
| Harrison 1999 [71]                  | RCT        | 33           | homeopathic therapy vs. conventional therapy (not further specified)                                                                                        | otitis media with reduction in hearing and effusion   | equivalence/ trend for homeopathy         | 1b        | +/-           | Patient groups too small; risk of performance and detection bias; unblinded randomization problematic                                                                                                                                    |

Abbreviations: n.j.: not judgeable; RCT: randomized clinical trial; CCT: controlled clinical trial; IV: internal validity; EV: external validity

**Table 4. Primary studies with homeopathic intervention for the indication 'Upper Respiratory Tract Infections/Allergic Reactions (URTI/A)' and placebo control**

| Author, Year [number in references] | Study Type | No. of Cases      | Homeopathic Intervention    | Indication                      | Result                      | EBM Grade | Ext. Validity | Comments                                                                                                                                                                                                                                                                                                                                                                                                                                                                                                                                                                                                                                                                           |
|-------------------------------------|------------|-------------------|-----------------------------|---------------------------------|-----------------------------|-----------|---------------|------------------------------------------------------------------------------------------------------------------------------------------------------------------------------------------------------------------------------------------------------------------------------------------------------------------------------------------------------------------------------------------------------------------------------------------------------------------------------------------------------------------------------------------------------------------------------------------------------------------------------------------------------------------------------------|
| de Lange de Klerk 1994 [72]         | RCT        | 175               | individual                  | URTI gen.                       | trend for homeopathy        | 1b        | +             | Good study with reference to design and adequate method for homeopathy, little details on homeopathic therapy; not enough patients for detection of effectiveness - lack of power                                                                                                                                                                                                                                                                                                                                                                                                                                                                                                  |
| Aabel 2000 [73]                     | RCT        | 80                | isopathy (Betula C30)       | rhinitis (birch-pollen-allergy) | no advantage                | 1b        | -             | Diagnosis not done according to homeopathic criteria, disturbing factors only partially considered; prevention is not a common homeopathic indication; restrictive selection of patients (concomitant diseases as exclusion criterion); allowed accompanying medication: local and systemic antihistamines. Pollen-flight was reduced in the year of the study (colder and rainier than in other years) and could have reduced or prevented the rate of symptoms. Comparability of study groups restricted (previous unconventional treatment: 14 patients in the homeopathic group, 6 patients in the control group), no information whether this was considered in the analysis. |
| Reilly 1985 [74]                    | RCT        | 39                | isopathy (grass pollen C30) | allergic rhinitis               | trend for homeopathy        | 1b        | +/-           | Study physicians were homeopaths with at least 5 year clinical experience. Group sizes too small; randomization and blinding not clear. Pilot study for further studies; for this it was useful.                                                                                                                                                                                                                                                                                                                                                                                                                                                                                   |
| Reilly 1986 [75]                    | RCT        | 158 (144 treated) | isopathy (grass pollen C30) | allergic rhinitis               | significance for homeopathy | 1b        | +/-           | Participating physicians used homeopathy in 18% of the cases (on average), nine of the physicians in less than 10%, and three hitherto used no homeopathy. Results were relatively exactly documented, however, it was not clear how the „lost to follow up" results entered the analysis.                                                                                                                                                                                                                                                                                                                                                                                         |

| Author, Year [number in references] | Study Type | No. of Cases      | Homeopathic Intervention                                                                   | Indication                    | Result                                                   | EBM Grade | Ext. Validity | Comments                                                                                                                                                                                                                                                                                             |
|-------------------------------------|------------|-------------------|--------------------------------------------------------------------------------------------|-------------------------------|----------------------------------------------------------|-----------|---------------|------------------------------------------------------------------------------------------------------------------------------------------------------------------------------------------------------------------------------------------------------------------------------------------------------|
| Taylor 2000 [76]                    | RCT        | 51                | isopathy (C30-preparation of the specific allergen)                                        | allergic rhinitis             | significance for homeopathy                              | 1b        | +/-           | For the homeopathy group primary aggravations were often observed. This was seen as sign of the effectiveness of homeopathic therapy, not as side-effect.                                                                                                                                            |
| Wiesenauer 1985 [77]                | RCT        | 164, 3-arm study  | clinical (Galphimia D6)                                                                    | allergic rhinitis             | trend for homeopathy                                     | 1b        | +/-           | Baseline data present less patients than shown in the tables of results! No explanation for this in the text.                                                                                                                                                                                        |
| Wiesenauer 1989 [78]                | RCT        | 152, 4-arm study  | complex (Luffa operculata D4, Potassium bichromatum D4, Cinnabaris D3, partially combined) | sinusitis                     | no advantage                                             | 1b        | -             | Lost to follow-up rate 31% (main reasons: badly completed questionnaires and not permitted medications; the reasons for the latter should be analyzed in more detail). Due to the evaluation in sub-groups (acute and chronic sinusitis) sample sizes are too small to draw any reliable conclusion. |
| Ferley 1989 [79]                    | RCT        | 478               | clinical (Oscillocoquinum not further specified)                                           | common cold                   | significance for homeopathy                              | 1b        | +/-           | Patients with influenza like symptoms from 149 general practices of the Rhones-Alpes Regiones, France; mixed, mostly non-homeopathic practice                                                                                                                                                        |
| Papp 1998 [80]                      | RCT        | 372               | clinical (Oscillocoquinum not further specified)                                           | common cold                   | significance for homeopathy                              | 1b        | +/-           | Careful analysis without any obvious bias                                                                                                                                                                                                                                                            |
| Jacobs 2001 [81]                    | RCT        | 75                | individual                                                                                 | otitis media                  | trend for primary, significance for secondary parameters | 1b        | +/-           | Author points out that maybe due to small sample sizes only a trend for the homeopathic application could be seen                                                                                                                                                                                    |
| Mössinger 1985 [82]                 | CCT        | 44 (38 evaluated) | clinical (Pulsatilla D2)                                                                   | otitis media, endosalpingitis | significance for homeopathy                              | 1b        | n.j.          | Physicians' homeopathic training not clear, specific homeopathic diagnosis not clear. Altogether little information.                                                                                                                                                                                 |
| Friese 2001 [83]                    | RCT        | 97                | clinical (sequence of four homeopathic medications)                                        | adenoid vegetations           | no advantage, high placebo responder rate                | 1b        | +/-           | Related to disease parameters groups were not comparable. No adjustment given for the evaluation. No drop-outs. Surgery was no longer indicated in 63,8% of patients in the placebo group at the end of the study (homeopathy group: 66%) – high placebo response rate                               |

| Author, Year [number in references] | Study Type | No. of Cases     | Homeopathic Intervention                                                                       | Indication                                    | Result                                                                                           | EBM Grade | Ext. Validity | Comments                                                                                                                                                                                                                                                                                                                                                                  |
|-------------------------------------|------------|------------------|------------------------------------------------------------------------------------------------|-----------------------------------------------|--------------------------------------------------------------------------------------------------|-----------|---------------|---------------------------------------------------------------------------------------------------------------------------------------------------------------------------------------------------------------------------------------------------------------------------------------------------------------------------------------------------------------------------|
| Lewith 2002 [84]                    | RCT        | 242              | isopathy (potentized house dust)                                                               | allergic asthma                               | significance for homeopathy (differences clinically not relevant)                                | 1b        | +             | Very exact study planning                                                                                                                                                                                                                                                                                                                                                 |
| Matusiewicz 1997 [85]               | CCT        | 50 (6-arm study) | complex (Engystol N® + Traumeel®), Cyclosporin A, Methotrexat, placebo in various combinations | corticoid-dependent allergic bronchial asthma | significance for homeopathy (however only before-after difference in treatment for 21 variables) | 2a        | -             | Information on randomization, blinding and group composition, etc. insufficient for assessment. Sample sizes very small with 5 to 11 patients per arm; study setup unclear                                                                                                                                                                                                |
| Reilly 1994 [86]                    | RCT        | 28               | isopathy (of the individual allergen)                                                          | allergic asthma                               | significance for homeopathy                                                                      | 1b        | +/-           | The performing physicians were only partially homeopaths. Good performance of the study, apart from the small number of patients. Selection of patients after randomization for further participation in the study not clearly described. With this study and two additional previous ones a meta-analysis was carried which also showed a positive result for homeopathy |
| White 2003 [87]                     | RCT        | 36               | individual (in addition to conventional therapy vs. placebo + conventional therapy)            | asthma bronchiale (children)                  | no advantage                                                                                     | 1b        | +/-           | Tendency for positive effects for severe asthma could be observed; for some secondary parameters there was a "trend for the therapy". The case number was too small to be able to make any further statements.                                                                                                                                                            |

Abbreviation n.j.: not judgeable
